# Supplementary material
Source: PubMed Central journal article supplement (PMC3477753)
Supplement: tjp0590-4483-SD1.pdf [file tjp0590-4483-SD1.pdf]

## MODEL PARAMETERS

### Cell compartments

$C = 32$  pF: Cell electric capacitance

$L_{cell} = 70$   $\mu\text{m}$ : Cell length

$L_{sub} = 0.02$   $\mu\text{m}$ : Distance between jSR and surface membrane (submembrane space)

$R_{cell} = 4$   $\mu\text{m}$ : Cell radius

$V_{ipart} = 0.46$ : Part of cell volume occupied with myoplasm

$V_{jSRpart} = 0.0012$ : Part of cell volume occupied by junctional SR

$V_{nSRpart} = 0.0116$ : Part of cell volume occupied by network SR

$V_{cell} = \pi \cdot R_{cell}^2 \cdot L_{cell}$ : Cell volume

$V_{sub} = 2 \cdot \pi \cdot L_{sub} \cdot \left(R_{cell} - \frac{L_{sub}}{2}\right) \cdot L_{cell}$ : Submembrane space volume

$V_i = V_{ipart} \cdot V_{cell} - V_{sub}$ : Myoplasmic volume

$V_{jSR} = V_{jSRpart} \cdot V_{cell}$ : Volume of junctional SR (Ca<sup>2+</sup> release store)

$V_{nSR} = V_{nSRpart} \cdot V_{cell}$ : Volume of network SR (Ca<sup>2+</sup> uptake store)

### Fixed ion concentrations, mM

$Ca_o = 2$ : Extracellular Ca<sup>2+</sup> concentration

$Ki = 140$ : Intracellular K<sup>+</sup> concentration

$Ko = 5.4$ : Extracellular K<sup>+</sup> concentration

$Na_o = 140$ : Extracellular Na<sup>+</sup> concentration

$Mgi = 2.5$ : Intracellular Mg<sup>2+</sup> concentration.

### Variable ion concentrations

$Ca_i$ : Intracellular Ca<sup>2+</sup> concentration

$Ca_{jSR}$ : Ca<sup>2+</sup> concentration in the junctional SR

$Ca_{nSR}$ : Ca<sup>2+</sup> concentration in the network SR

$Ca_{sub}$ : Subspace  $Ca^{2+}$  concentration

$Na_i$ : Intracellular  $Na^+$  concentration.

### **Ionic values**

$F = 96485$  C/M: Faraday constant

$R = 8.314$  J/(kM·K): Universal gas constant

$T = 310$  K: Absolute temperature for 37°C

$RTONF$  is “R·T/F” factor = 26.72655 mV

$E_{Na} = RTONF \cdot \ln \frac{Na_o}{Na_i}$ : Equilibrium potential for  $Na^+$

$E_K = RTONF \cdot \ln \frac{K_o}{K_i}$ : Equilibrium potential for  $K^+$

$E_{Ca} = 0.5 \cdot RTONF \cdot \ln \frac{Ca_o}{Ca_{sub}}$ : Equilibrium potential for  $Ca^{2+}$

### **Sarcolemmal Ion currents and their conductances**

$I_f$ : Hyperpolarization-activated current ( $g_{f_{Na}} = 0.03$   $\mu$ S,  $g_{f_k} = 0.03$   $\mu$ S)

$I_{CaL}$ : L-type  $Ca^{2+}$  current ( $P_{CaL} = 0.2$  nA/mM)

$I_{CaT}$ : T-type  $Ca^{2+}$  current ( $P_{CaT} = 0.02$  nA/mM)

$I_{Kr}$ : Delayed rectifier  $K^+$  current rapid component ( $g_{Kr} = 0.0021637$   $\mu$ S)

$I_{Ks}$ : Delayed rectifier  $K^+$  current slow component ( $g_{Ks} = 0.0016576$   $\mu$ S)

$I_{KACH}$ : Ach-activated  $K^+$  current ( $g_{KACH} = 0.00864$   $\mu$ S)

$I_{to}$ : Transient outward  $K^+$  current ( $g_{to} = 0.002$   $\mu$ S)

$I_{Na}$ :  $Na^+$  current ( $g_{Na} = 0.0125$   $\mu$ S)

$I_{NaK}$ :  $Na^+/K^+$  pump current ( $I_{NaK_{max}} = 0.063$  nA)

$I_{NaCa}$ :  $Na^+/Ca^{2+}$  exchanger current ( $K_{NaCa} = 4$  nA)

### **Modulation of sarcolemmal ion currents by ions**

$Km_{fCa} = 0.00035$  mM: Dissociation constant of  $Ca^{2+}$ -dependent  $I_{CaL}$  inactivation

$Km_{Kp} = 1.4$  mM: Half-maximal  $K_o$  for  $I_{NaK}$

$Km_{Nap} = 14$  mM: Half-maximal  $Na_i$  for  $I_{NaK}$

$\alpha_{fca} = 0.01$  ms<sup>-1</sup>: Ca<sup>2+</sup> dissociation rate constant for  $I_{CaL}$

### **Na<sup>+</sup>/Ca<sup>2+</sup> exchanger (NaCa) function, mM**

$K1ni = 395.3$ : intracellular Na<sup>+</sup> binding to first site on NaCa

$K1no = 1628$ : extracellular Na<sup>+</sup> binding to first site on NaCa

$K2ni = 2.289$ : intracellular Na<sup>+</sup> binding to second site on NaCa

$K2no = 561.4$ : extracellular Na<sup>+</sup> binding to second site on NaCa

$K3ni = 26.44$ : intracellular Na<sup>+</sup> binding to third site on NaCa

$K3no = 4.663$ : extracellular Na<sup>+</sup> binding to third site on NaCa

$Kci = 0.0207$ : intracellular Ca<sup>2+</sup> binding to NaCa transporter

$Kcni = 26.44$ : intracellular Na<sup>+</sup> and Ca<sup>2+</sup> simultaneous binding to NaCa

$Kco = 3.663$ : extracellular Ca<sup>2+</sup> binding to NaCa transporter

$Qci = 0.1369$ : intracellular Ca<sup>2+</sup> occlusion reaction of NaCa

$Qco = 0$ : extracellular Ca<sup>2+</sup> occlusion reaction of NaCa

$Qn = 0.4315$ : Na<sup>+</sup> occlusion reactions of NaCa

### **Ca<sup>2+</sup> diffusion**

$\tau_{difca} = 0.00004$  s: Time constant of Ca<sup>2+</sup> diffusion from the submembrane to myoplasm

$\tau_{tr} = 0.04$  s: Time constant for Ca<sup>2+</sup> transfer from the network to junctional SR

### **SR Ca<sup>2+</sup> ATPase function**

$K_{up} = 0.0006$  mM: Half-maximal Ca<sub>i</sub> for Ca<sup>2+</sup> uptake in the network SR

$P_{up} = 12$  mM/s: Rate constant for Ca<sup>2+</sup> uptake by the Ca<sup>2+</sup> pump in the network SR

### **RyR function**

$$kiCa = 500 \text{ mM}^{-1} \cdot \text{s}^{-1}$$

$$kim = 5 \text{ s}^{-1}$$

$$koCa = 10000 \text{ mM}^{-2} \cdot \text{s}^{-1}$$

$$kom = 60 \text{ s}^{-1}$$

$$ks = 250000000 \text{ s}^{-1}$$

$$EC50_{SR} = 0.45 \text{ mM}$$

$$HSR = 2.5$$

$$MaxSR = 15$$

$$MinSR = 1$$

### **Ca<sup>2+</sup> and Mg<sup>2+</sup> buffering**

$$CM_{tot} = 0.045 \text{ mM: Total calmodulin concentration}$$

$$CQ_{tot} = 10 \text{ mM: Total calsequestrin concentration}$$

$$TC_{tot} = 0.031 \text{ mM: Total concentration of the troponin-Ca}^{2+} \text{ site}$$

$$TMC_{tot} = 0.062 \text{ mM: Total concentration of the troponin-Mg}^{2+} \text{ site}$$

$$kb_{CM} = 542 \text{ s}^{-1}: \text{Ca}^{2+} \text{ dissociation constant for calmodulin}$$

$$kb_{CQ} = 445 \text{ s}^{-1}: \text{Ca}^{2+} \text{ dissociation constant for calsequestrin}$$

$$kb_{TC} = 446 \text{ s}^{-1}: \text{Ca}^{2+} \text{ dissociation constant for the troponin-Ca}^{2+} \text{ site}$$

$$kb_{TMC} = 7.51 \text{ s}^{-1}: \text{Ca}^{2+} \text{ dissociation constant for the troponin-Mg}^{2+} \text{ site}$$

$$kb_{TMM} = 751 \text{ s}^{-1}: \text{Mg}^{2+} \text{ dissociation constant for the troponin-Mg}^{2+} \text{ site}$$

$$kf_{CM} = 227700 \text{ s}^{-1}: \text{Ca}^{2+} \text{ association constant for calmodulin}$$

$$kf_{CQ} = 534 \text{ s}^{-1}: \text{Ca}^{2+} \text{ association constant for calsequestrin}$$

$$kf_{TC} = 88.8 \text{ s}^{-1}: \text{Ca}^{2+} \text{ association constant for troponin}$$

$$kf_{TMC} = 227700 \text{ s}^{-1}: \text{Ca}^{2+} \text{ association constant for the troponin-Mg}^{2+} \text{ site}$$

$$kf_{TMM} = 2277 \text{ s}^{-1}: \text{Mg}^{2+} \text{ association constant for the troponin-Mg}^{2+} \text{ site}$$

## EQUATIONS

### Membrane potential

$$\frac{dV}{dt} = \frac{-I_{tot}}{C}$$

$$I_{tot} = I_f + I_{Kr} + I_{Ks} + I_{to} + I_{NaK} + I_{NaCa} + I_{Na} + I_{CaL} + I_{CaT} + I_{KACH}$$

### Ion currents

$x_{\infty}$ : Steady-state curve for a gating variable  $x$

$\tau_x$ : Time constant for a gating variable  $x$

$\alpha_x$  and  $\beta_x$ : Opening and closing rates for channel gating

### **Hyperpolarization-activated, “funny” current ( $I_f$ )**

$$I_f = (I_{fNa} + I_{fK})$$

$$I_{fNa} = \frac{y^2 \cdot Ko}{Ko + Km_f} \cdot g_{fNa} \cdot (V - E_{Na})$$

$$I_{fK} = \frac{y^2 \cdot Ko}{Ko + Km_f} \cdot g_{fK} \cdot (V - E_K)$$

$$Km_f = 45 \text{ mM}$$

$$y_{\infty} = \frac{1}{1 + e^{\frac{V+52.5}{9}}}$$

$$\tau_y = \frac{0.7}{0.0708 \cdot e^{\frac{-(V+5)}{20.28}} + 10.6 \cdot e^{\frac{V}{18}}}$$

$$\frac{dy}{dt} = \frac{y_{\infty} - y}{\tau_y}$$

### **L-type $Ca^{2+}$ current ( $I_{CaL}$ )**

$$I_{CaL} = (I_{siCa} + I_{siK} + I_{siNa})$$

$$I_{siCa} = \frac{2 \cdot P_{CaL} \cdot V}{RTONF \cdot \left(1 - e^{\frac{-2 \cdot V}{RTONF}}\right)} \cdot \left(Ca_{sub} - Ca_o \cdot e^{\frac{-2 \cdot V}{RTONF}}\right) \cdot dL \cdot fL \cdot fCa$$

$$I_{siK} = \frac{0.000365 \cdot P_{CaL} \cdot V}{RTONF \cdot \left(1 - e^{\frac{-V}{RTONF}}\right)} \cdot \left(Ki - Ko \cdot e^{\frac{-1V}{RTONF}}\right) \cdot dL \cdot fL \cdot fCa$$

$$I_{siNa} = \frac{0.0000185 \cdot P_{CaL} \cdot V}{RTONF \cdot \left(1 - e^{\frac{-V}{RTONF}}\right)} \cdot \left(Nai - Nao \cdot e^{\frac{-V}{RTONF}}\right) \cdot dL \cdot fL \cdot fCa$$

$$dL_{\infty} = \frac{1}{1 + e^{\frac{-(V+20.3)}{4.2}}}$$

$$\alpha_{dL} = \frac{-0.02839 \cdot (V + 41.8)}{e^{\frac{-(V+41.8)}{2.5}} - 1} - \frac{0.0849 \cdot (V + 6.8)}{e^{\frac{-(V+6.8)}{4.8}} - 1}$$

$$\beta_{dL} = \frac{0.01143 \cdot (V + 1.8)}{e^{\frac{V+1.8}{2.5}} - 1}$$

$$\tau_{dL} = \frac{0.001}{\alpha_{dL} + \beta_{dL}}$$

$$\frac{ddL}{dtime} = \frac{dL_{\infty} - dL}{\tau_{dL}}$$

$$fL_{\infty} = \frac{1}{1 + e^{\frac{V+37.4}{5.3}}}$$

$$\tau_{fL} = 0.001 \cdot \left(44.3 + 230 \cdot e^{-\left(\frac{V+36}{10}\right)^2}\right)$$

$$\frac{dfL}{dtime} = \frac{fL_{\infty} - fL}{\tau_{fL}}$$

$$fCa_{\infty} = \frac{Km_{fCa}}{Km_{fCa} + Ca_{sub}}$$

$$\tau_{fCa} = \frac{0.001 \cdot fCa_{\infty}}{\alpha_{fCa}}$$

$$\frac{dfCa}{dtime} = \frac{fCa_{\infty} - fCa}{\tau_{fCa}}$$

### T-type Ca<sup>2+</sup> current (I<sub>CaT</sub>)

$$I_{CaT} = \frac{2 \cdot P_{CaT} \cdot V}{RTONF \cdot \left(1 - e^{\frac{-2 \cdot V}{RTONF}}\right)} \cdot \left(Ca_{sub} - Cao \cdot e^{\frac{-2 \cdot V}{RTONF}}\right) \cdot dT \cdot fT$$

$$dT_{\infty} = \frac{1}{1 + e^{\frac{-(V+38.3)}{5.5}}}$$

$$\tau_{dT} = \frac{0.001}{1.068 \cdot e^{\frac{V+38.3}{30}} + 1.068 \cdot e^{\frac{-(V+38.3)}{30}}}$$

$$\frac{ddT}{dtime} = \frac{dT_{\infty} - dT}{\tau_{dT}}$$

$$fT_{\infty} = \frac{1}{1 + e^{\frac{V+58.7}{3.8}}}$$

$$\tau_{fT} = \frac{1}{16.67 \cdot e^{\frac{-(V+75)}{83.3}} + 16.67 \cdot e^{\frac{V+75}{15.38}}}$$

$$\frac{dfT}{dtime} = \frac{fT_{\infty} - fT}{\tau_{fT}}$$

### Rapidly activating delayed rectifier K<sup>+</sup> current ( $I_{Kr}$ )

$$I_{Kr} = g_{Kr} \cdot (V - E_K) \cdot (0.9 \cdot paF + 0.1 \cdot paS) \cdot pi$$

$$pa_{\infty} = \frac{1}{1 + e^{\frac{-(V+14.8)}{8.5}}}$$

$$\tau_{paF} = \frac{1}{30 \cdot e^{\frac{V}{10}} + e^{\frac{-V}{12}}}$$

$$\frac{dpaF}{dtime} = \frac{pa_{\infty} - paF}{\tau_{paF}}$$

$$\tau_{paS} = \frac{0.84655}{4.2 \cdot e^{\frac{V}{17}} + 0.15 \cdot e^{\frac{-V}{21.6}}}$$

$$\frac{dpaS}{dtime} = \frac{pa_{\infty} - paS}{\tau_{paS}}$$

$$pi_{\infty} = \frac{1}{1 + e^{\frac{V+28.6}{17.1}}}$$

$$\tau_{pi} = \frac{1}{100 \cdot e^{\frac{-V}{54.645}} + 656 \cdot e^{\frac{V}{106.157}}}$$

$$\frac{dpi}{dtime} = \frac{pi_{\infty} - pi}{\tau_{pi}}$$

### Slowly activating delayed rectifier K<sup>+</sup> current ( $I_{Ks}$ )

$$I_{Ks} = g_{Ks} \cdot (V - E_K) \cdot n^2$$

$$n_{\infty} = \frac{\frac{14}{1 + e^{\frac{-(V-40)}{9}}}}{\frac{14}{1 + e^{\frac{-(V-40)}{9}}} + 1 \cdot e^{\frac{-V}{45}}}$$

$$\tau_n = \frac{1}{\frac{28}{1 + e^{\frac{-(V-40)}{3}}} + e^{\frac{-(V-5)}{25}}}$$

$$\frac{dn}{dt} = \frac{n_{\infty} - n}{\tau_n}$$

### Ach-activated K<sup>+</sup> current ( $I_{KACH}$ )

$$I_{KACH} = \begin{cases} g_{KACH} \cdot (V - E_K) \cdot \left(1 + e^{\frac{V+20}{20}}\right) \cdot a, & \text{if } ACh > 0 \\ 0, & \text{otherwise} \end{cases}$$

$$a_{\infty} = \frac{\alpha_a}{\alpha_a + \beta_a}$$

$$\alpha_a = \frac{3.5988 - 0.0256}{1 + \frac{0.0000012155}{(1 \cdot ACh)^{1.6951}}} + 0.0256$$

$$\beta_a = 10 \cdot e^{0.0133 \cdot (V+40)}$$

$$\tau_a = \frac{1}{\alpha_a + \beta_a}$$

$$\frac{da}{dt} = \frac{a_{\infty} - a}{\tau_a}$$

### Transient outward K<sup>+</sup> current ( $I_{to}$ )

$$I_{to} = g_{to} \cdot (V - E_K) \cdot q \cdot r$$

$$q_{\infty} = \frac{1}{1 + e^{\frac{V+49}{13}}}$$

$$\tau_q = 0.001 \cdot 0.6 \cdot \left( \frac{65.17}{0.57 \cdot e^{-0.08 \cdot (V+44)} + 0.065 \cdot e^{0.1 \cdot (V+45.93)}} + 10.1 \right)$$

$$\frac{dq}{dt} = \frac{q_{\infty} - q}{\tau_q}$$

$$r_{\infty} = \frac{1}{1 + e^{\frac{-(V-19.3)}{15}}}$$



$$\tau_r = 0.001 \cdot 0.66 \cdot 1.4 \cdot \left( \frac{15.59}{1.037 \cdot e^{0.09 \cdot (V+30.61)} + 0.369 \cdot e^{-0.12 \cdot (V+23.84)}} + 2.98 \right)$$

$$\frac{dr}{dtime} = \frac{r_\infty - r}{\tau_r}$$

### Na<sup>+</sup> current ( $I_{Na}$ )

$$I_{Na} = g_{Na} \cdot m^3 \cdot h \cdot (V - E_{mh})$$

$$E_{mh} = RTONF \cdot \ln \frac{Na_o + 0.12 \cdot Ko}{Na_i + 0.12 \cdot Ki}$$

$$E0_m = V + 41$$

$$\delta_m = 1 \cdot 10^{-5} \text{ mV}$$

$$\frac{dm}{dtime} = \alpha_m \cdot (1 - m) - \beta_m \cdot m$$

$$\alpha_m = \begin{cases} 2000, & \text{if } |E0_m| < \delta_m \\ \frac{200 \cdot E0_m}{1 - e^{-0.1 \cdot E0_m}}, & \text{otherwise} \end{cases}$$

$$\beta_m = 8000 \cdot e^{-0.056 \cdot (V+66)}$$

$$\frac{dh}{dtime} = \alpha_h \cdot (1 - h) - \beta_h \cdot h$$

$$\alpha_h = 20 \cdot e^{-0.125 \cdot (V+75)}$$

$$\beta_h = \frac{2,000}{320 \cdot e^{-0.1 \cdot (V+75)} + 1}$$

### Na<sup>+</sup>-K<sup>+</sup> pump current ( $I_{NaK}$ )

$$I_{NaK} = I_{NaK_{max}} \cdot \left( 1 + \left( \frac{Km_{Kp}}{Ko} \right)^{1.2} \right)^{-1} \cdot \left( 1 + \left( \frac{Km_{Nap}}{Na_i} \right)^{1.3} \right)^{-1} \cdot \left( 1 + e^{\frac{-(V-E_{Na}+110)}{20}} \right)^{-1}$$

### Na<sup>+</sup>-Ca<sup>2+</sup> exchanger current ( $I_{NaCa}$ )

$$I_{NaCa} = \frac{K_{NaCa} \cdot (x2 \cdot k21 - x1 \cdot k12)}{x1 + x2 + x3 + x4}$$

$$x1 = k41 \cdot k34 \cdot (k23 + k21) + k21 \cdot k32 \cdot (k43 + k41)$$

$$x2 = k32 \cdot k43 \cdot (k14 + k12) + k41 \cdot k12 \cdot (k34 + k32)$$

$$x3 = k14 \cdot k43 \cdot (k23 + k21) + k12 \cdot k23 \cdot (k43 + k41)$$

$$x4 = k23 \cdot k34 \cdot (k14 + k12) + k14 \cdot k21 \cdot (k34 + k32)$$

$$k43 = \frac{Nai}{K3ni + Nai}$$

$$k12 = \frac{\frac{Ca_{sub}}{Kci} \cdot e^{\frac{-Qci \cdot V}{RTONF}}}{di}$$

$$k14 = \frac{\frac{\frac{Nai}{K1ni} \cdot Nai}{K2ni} \cdot \left(1 + \frac{Nai}{K3ni}\right) \cdot e^{\frac{Qn \cdot V}{2 \cdot RTONF}}}{di}$$

$$k41 = e^{\frac{-Qn \cdot V}{2 \cdot RTONF}}$$

$$di = 1 + \frac{Ca_{sub}}{Kci} \cdot \left(1 + e^{\frac{-Qci \cdot V}{RTONF}} + \frac{Nai}{Kcni}\right) + \frac{Nai}{K1ni} \cdot \left(1 + \frac{Nai}{K2ni} \cdot \left(1 + \frac{Nai}{K3ni}\right)\right)$$

$$k34 = \frac{Nao}{K3no + Nao}$$

$$k21 = \frac{\frac{Cao}{Kco} \cdot e^{\frac{Qco \cdot V}{RTONF}}}{do}$$

$$k23 = \frac{\frac{\frac{Nao}{K1no} \cdot Nao}{K2no} \cdot \left(1 + \frac{Nao}{K3no}\right) \cdot e^{\frac{-Qn \cdot V}{2 \cdot RTONF}}}{do}$$

$$k32 = e^{\frac{Qn \cdot V}{2 \cdot RTONF}}$$

$$do = 1 + \frac{Cao}{Kco} \cdot \left(1 + e^{\frac{Qco \cdot V}{RTONF}}\right) + \frac{Nao}{K1no} \cdot \left(1 + \frac{Nao}{K2no} \cdot \left(1 + \frac{Nao}{K3no}\right)\right)$$

### Ca<sup>2+</sup> release flux ( $J_{rel}$ ) from SR via RyRs

$$J_{rel} = ks \cdot O \cdot (Ca_{jsr} - Ca_{sub})$$

$$kCaSR = MaxSR - \frac{MaxSR - MinSR}{1 + \left(\frac{EC50_{SR}}{Ca_{jsr}}\right)^{HSR}}$$

$$koSRCa = \frac{koCa}{kCaSR}$$

$$kiSRCa = kiCa \cdot kCaSR$$

$$\frac{dR}{dt} = kim \cdot RI - kiSRCa \cdot Ca_{sub} \cdot R - (koSRCa \cdot Ca_{sub}^2 \cdot R - kom \cdot O)$$

$$\frac{dO}{dt} = koSRCa \cdot Ca_{sub}^2 \cdot R - kom \cdot O - (kiSRCa \cdot Ca_{sub} \cdot O - kim \cdot I)$$

$$\frac{dI}{dt} = kiSRCa \cdot Ca_{sub} \cdot O - kim \cdot I - (kom \cdot I - koSRCa \cdot Ca_{sub}^2 \cdot RI)$$

$$\frac{dRI}{dt} = kom \cdot I - koSRCa \cdot Ca_{sub}^2 \cdot RI - (kim \cdot RI - kiSRCa \cdot Ca_{sub} \cdot R)$$

### Intracellular Ca<sup>2+</sup> fluxes

$J_{diff}$  : Ca<sup>2+</sup> diffusion flux from submembrane space to myoplasm

$J_{tr}$ : Ca<sup>2+</sup> transfer flux from the network to junctional SR

$J_{up}$ : Ca<sup>2+</sup> uptake by the SR

$$J_{diff} = \frac{Ca_{sub} - Cai}{\tau_{difca}}$$

$$J_{tr} = \frac{Ca_{nsr} - Ca_{jsr}}{\tau_{tr}}$$

$$J_{up} = \frac{P_{up}}{1 + \frac{K_{up}}{Cai}}$$

### Ca<sup>2+</sup> buffering

$f_{CMi}$  : Fractional occupancy of calmodulin by Ca<sup>2+</sup> in myoplasm

$f_{CMS}$  : Fractional occupancy of calmodulin by Ca<sup>2+</sup> in subspace

$f_{CQ}$ : Fractional occupancy of calsequestrin by Ca<sup>2+</sup>

$f_{TC}$  : Fractional occupancy of the troponin-Ca<sup>2+</sup> site by Ca<sup>2+</sup>

$f_{TMC}$ : Fractional occupancy of the troponin-Mg<sup>2+</sup> site by Ca<sup>2+</sup>

$f_{TMM}$ : Fractional occupancy of the troponin-Mg<sup>2+</sup> site by Mg<sup>2+</sup>

$$\frac{df_{CMi}}{dt} = \delta_{f_{CMi}}$$

$$\delta_{f_{CMi}} = kf_{CM} \cdot Cai \cdot (1 - f_{CMi}) - kb_{CM} \cdot f_{CMi}$$

$$\frac{df_{CMs}}{dtime} = \delta_{f_{CMs}}$$

$$\delta_{f_{CMs}} = kf_{CM} \cdot Ca_{sub} \cdot (1 - f_{CMs}) - kb_{CM} \cdot f_{CMs}$$

$$\frac{df_{CQ}}{dtime} = \delta_{f_{CQ}}$$

$$\delta_{f_{CQ}} = kf_{CQ} \cdot Ca_{jsr} \cdot (1 - f_{CQ}) - kb_{CQ} \cdot f_{CQ}$$

$$\frac{df_{TC}}{dtime} = \delta_{f_{TC}}$$

$$\delta_{f_{TC}} = kf_{TC} \cdot Cai \cdot (1 - f_{TC}) - kb_{TC} \cdot f_{TC}$$

$$\frac{df_{TMC}}{dtime} = \delta_{f_{TMC}}$$

$$\delta_{f_{TMC}} = kf_{TMC} \cdot Cai \cdot (1 - (f_{TMC} + f_{TMM})) - kb_{TMC} \cdot f_{TMC}$$

$$\frac{df_{TMM}}{dtime} = \delta_{f_{TMM}}$$

$$\delta_{f_{TMM}} = kf_{TMM} \cdot Mgi \cdot (1 - (f_{TMC} + f_{TMM})) - kb_{TMM} \cdot f_{TMM}$$

### Dynamics of $Ca^{2+}$ concentrations in cell compartments

$$\frac{dCai}{dtime} = \left( \frac{J_{diff} \cdot V_{sub} - J_{up} \cdot V_{nsr}}{V_i} - (CM_{tot} \cdot \delta_{f_{CMi}} + TC_{tot} \cdot \delta_{f_{TC}} + TMC_{tot} \cdot \delta_{f_{TMC}}) \right) - \frac{df_{BAPTA}}{dtime}$$

$$\frac{dCa_{sub}}{dtime} = \left( \frac{J_{rel} \cdot V_{jsr}}{V_{sub}} - \left( \frac{I_{siCa} + I_{CaT} - 2 \cdot I_{NaCa}}{2 \cdot F \cdot V_{sub}} + J_{Ca_{diff}} + CM_{tot} \cdot \delta_{f_{CMs}} \right) \right) - \frac{df_{BAPTA_{sub}}}{dtime}$$

$$\frac{dCa_{nsr}}{dtime} = J_{up} - \frac{J_{tr} \cdot V_{jsr}}{V_{nsr}}$$

$$\frac{dCa_{jsr}}{dtime} = J_{tr} - (J_{rel} + CQ_{tot} \cdot \delta_{f_{CQ}})$$

### Dynamics of intracellular $Na^+$ concentration

$$\frac{dNai}{dtime} = - \frac{I_{Na} + I_{fNa} + I_{siNa} + 3 \cdot I_{NaK} + 3 \cdot I_{NaCa}}{(V_i + V_{sub}) \cdot F}$$

## RATE MODULATION EXPERIMENTS

### Cesium 5 mM

Voltage-dependent reduction of the  $I_f$  conductance ( $g_{f_{Na}}$  and  $g_{f_K}$ ):  $\frac{\frac{10.6015}{5}}{\frac{10.6015}{5} + e^{\frac{-0.71 \cdot V}{25}}}$

### Ivabradine 3 $\mu$ M

Reduction of 66% of the  $I_f$  conductance ( $g_{f_{Na}}$  and  $g_{f_K}$ ).

### Acetylcholine 10 nM

$I_f$ : shift of  $y_\infty$  and  $\tau_y$  by -5 mV;

$I_{Ca,L}$ : reduction of the maximal conductance of 3%;

SRCa<sup>2+</sup> uptake: decrease of  $P_{up}$  by 7%.

$I_{K_{ACh}}$  activation

### Isoprenaline 1 $\mu$ M

$I_f$ : shift of  $y_\infty$  and  $\tau_y$  by 7.5 mV;

$I_{NaK}$ : increase of  $I_{NaK_{max}}$  of 20%;

$I_{Ca,L}$ : increase of the maximal conductance of 23%, shift of  $dL_\infty$  and  $\tau_{dL}$  by -8 mV; reduction of 31% of the inverse of the slope factor of  $dL_\infty$ ;

$I_{K_S}$ : increase of  $g_{K_S}$  of 20%; shift of  $n_\infty$  and  $\tau_n$  by -14 mV;

SRCa<sup>2+</sup> uptake: increase of  $P_{up}$  by 25%.

### BAPTA 10 mM

$f_{BAPTA}$ : concentration of BAPTA bound to Ca<sup>2+</sup>;

$kb_{BAPTA} = 119.38 \text{ s}^{-1}$ : Ca<sup>2+</sup> dissociation constant for BAPTA;

$kf_{BAPTA} = 940000 \text{ mM}^{-1}\text{s}^{-1}$ : Ca<sup>2+</sup> association constant for BAPTA;

BAPTA.=10 mM: total BAPTA concentration;

$$\frac{df_{BAPTA}}{dt} = kf_{BAPTA} \cdot Cai \cdot (\text{or } Ca_{sub}) \cdot (BAPTA - f_{BAPTA}) - kb_{BAPTA} \cdot f_{BAPTA}$$

$Nai$  was held to 7.5 mM during the simulation of this experiment

## FIGURES

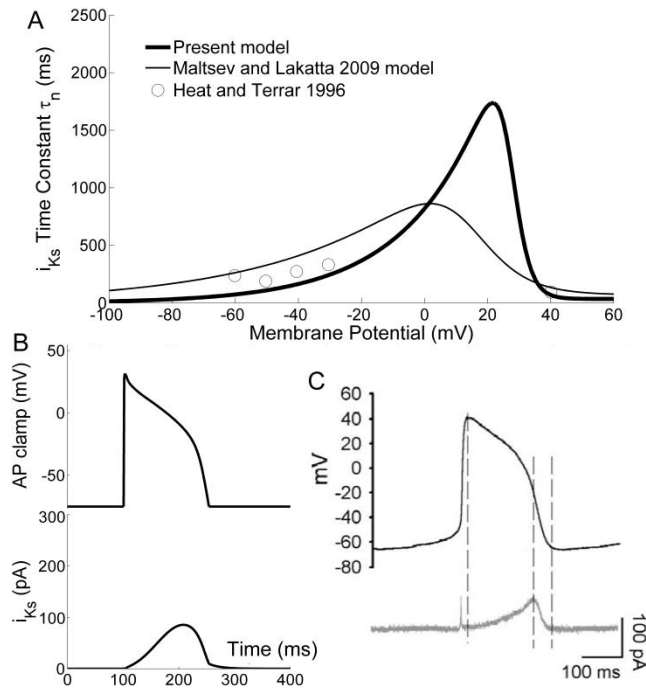

**Figure S1.  $I_{Ks}$  current.** A: time constant of  $I_{Ks}$  activation ( $\tau_n$ ), our formulation (thick line) and that from ML model (thin line); also shown are experimental data from Heath & Terrar (1996) on guinea-pig ventricular cells (open circles). B: Simulation of AP-clamp, reproducing the results of AP-clamp experiments of Lei et al. (2002) in C (redrawn with permission).

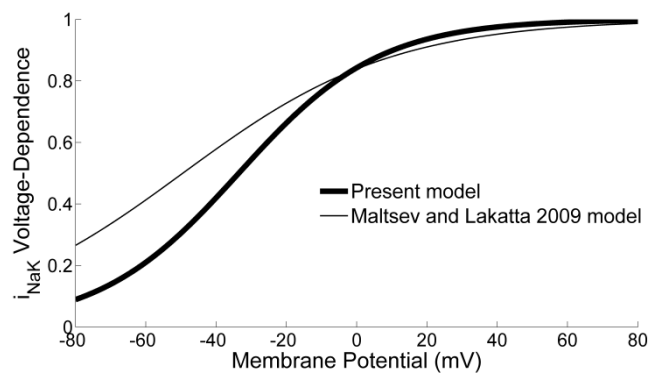

**Figure S2. Voltage-dependence of  $Na^+/K^+$  pump current ( $I_{NaK}$ ).** Our voltage-dependent component of  $I_{NaK}$  (thick line) is compared with that in ML model (thin line).

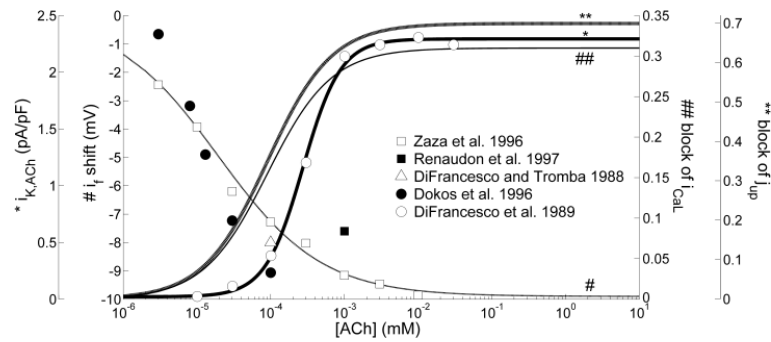

**Figure S3. ACh-dependent curves used to reconstruct ACh effect in the SAN model:**  $I_{K,ACh}$  curve (\*) fitted on DiFrancesco et al. (1989) data (open circles); negative shift of  $I_f$  kinetics (#) based on Zaza et al. (1996) (open squares), Renaudon et al. (1997) (filled squares), DiFrancesco & Tromba (1988) (open triangles) and Dokos et al. (1996) (filled circles) experimental data; inhibition of  $I_{CaL}$  current (##) and block of  $Ca^{2+}$  uptake (\*\*) were formulated as in Maltsev and Lakatta (2010).

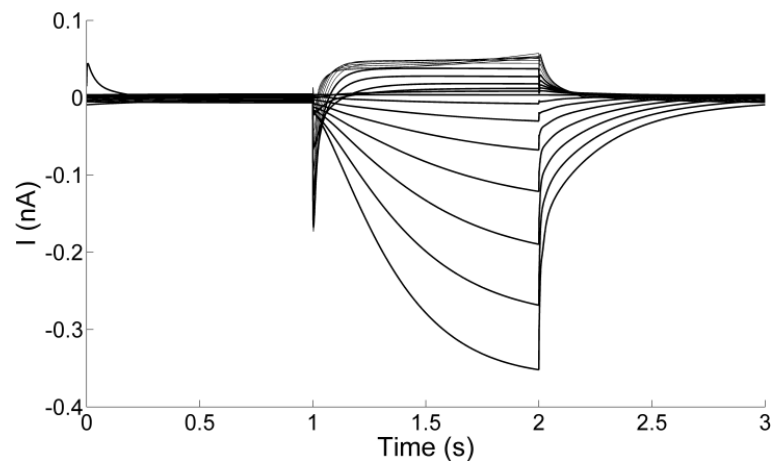

**Figure S4. Simulated voltage clamp experiment.** The plot shows superimposed records of the total membrane current in response to 1 s voltage clamp pulses from a holding potential of  $-40$  mV and test potentials ranging from  $-75$  mV to  $25$  mV (in  $5$  mV increments). Activation of  $I_f$  upon hyperpolarizing steps and activation of both  $I_{CaL}$  and  $I_{Kr,s}$  upon depolarizing steps can be observed. Our results agree with the experimental results of DiFrancesco et al. (1986), Denyer & Brown (1990) and van Ginneken and Giles (1991).

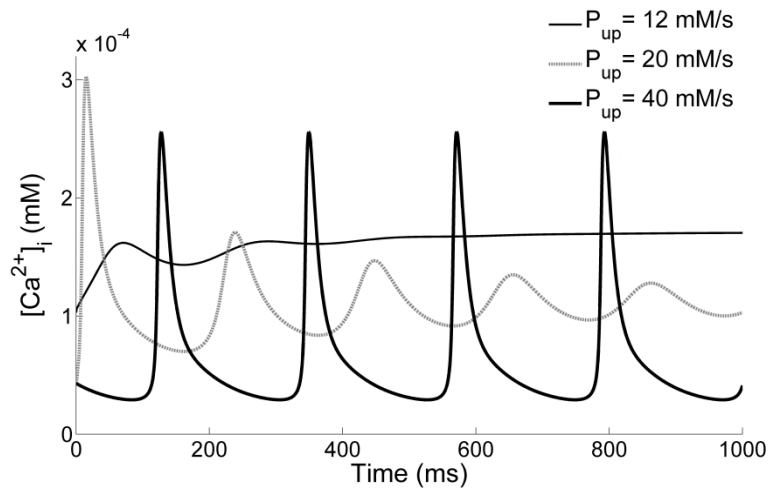

**Figure S5. Isolated  $\text{Ca}^{2+}$  SR oscillator.** Intracellular  $\text{Ca}^{2+}$  dynamics when all membrane currents are set to 0, at different  $P_{\text{up}}$  values. For  $P_{\text{up}} = 12, 20 \text{ mM}^{-1}$  we observe damping oscillations, while there are steady oscillations for  $P_{\text{up}} = 40 \text{ mM}^{-1}$ . As expected, the patterns are exactly the same as in figure 5C of Maltsev and Lakatta (2009).

#### REFERENCE LIST

Denyer JC & Brown HF (1990). Pacemaking in rabbit isolated sino-atrial node cells during  $\text{Cs}^+$  block of the hyperpolarization-activated current (if). *J Physiol* **429**, 401-409.

DiFrancesco D, Ducouret P & Robinson RB (1989). Muscarinic modulation of cardiac rate at low acetylcholine concentrations. *Science* **243**, 669-671.

DiFrancesco D, Ferroni A, Mazzanti M & Tromba C (1986). Properties of the hyperpolarizing-activated current (if) in cells isolated from the rabbit sino-atrial node. *J Physiol* **377**, 61-88.

DiFrancesco D & Tromba C (1988). Inhibition of the hyperpolarization-activated current (if) induced by acetylcholine in rabbit sino-atrial node myocytes. *J Physiol* **405**, 477-491.

Dokos S, Celler B & Lovell N (1996). Vagal Control of Sinoatrial Rhythm: a Mathematical Model. *J Theor Biol* **182**, 21-44.

Heath BM & Terrar DA (1996). Separation of the components of the delayed rectifier potassium current using selective blockers of  $\text{IKr}$  and  $\text{IKs}$  in guinea-pig isolated ventricular myocytes. *Exp Physiol* **81**, 587-603.



Lei M & Brown HF (1996). Two components of the delayed rectifier potassium current,  $I_K$ , in rabbit sino-atrial node cells. *Exp Physiol* **81**, 725-741.

Lei M, Cooper PJ, Camelliti P & Kohl P (2002). Role of the 293b-sensitive, slowly activating delayed rectifier potassium current,  $I_{Ks}$ , in pacemaker activity of rabbit isolated sino-atrial node cells. *Cardiovasc Res* **53**, 68-79.

Maltsev VA & Lakatta EG (2009). Synergism of coupled subsarcolemmal  $Ca^{2+}$  clocks and sarcolemmal voltage clocks confers robust and flexible pacemaker function in a novel pacemaker cell model. *Am J Physiol Heart Circ Physiol* **296**, H594-H615.

Maltsev VA & Lakatta EG (2010). A novel quantitative explanation for the autonomic modulation of cardiac pacemaker cell automaticity via a dynamic system of sarcolemmal and intracellular proteins. *Am J Physiol Heart Circ Physiol* **298**, H2010-H2023

Renaudon B, Bois P, Bescond J & Lenfant J (1997). Acetylcholine Modulates  $I_f$  and  $I_{K(ACh)}$  Via Different Pathways in Rabbit Sino-atrial Node Cells. *J Mol Cell Cardiol* **29**, 969-975.

van Ginneken AC & Giles W (1991). Voltage clamp measurements of the hyperpolarization-activated inward current  $I(f)$  in single cells from rabbit sino-atrial node. *J Physiol* **434**, 57-83.

Zaza A, Robinson RB & DiFrancesco D (1996). Basal responses of the L-type  $Ca^{2+}$  and hyperpolarization-activated currents to autonomic agonists in the rabbit sino-atrial node. *J Physiol* **491**, 347-355.
